# Supplementary material
Source: PubMed Central journal article supplement (PMC6243286)
Supplement: pnas.1713959115.sapp.pdf [file pnas.1713959115.sapp.pdf]

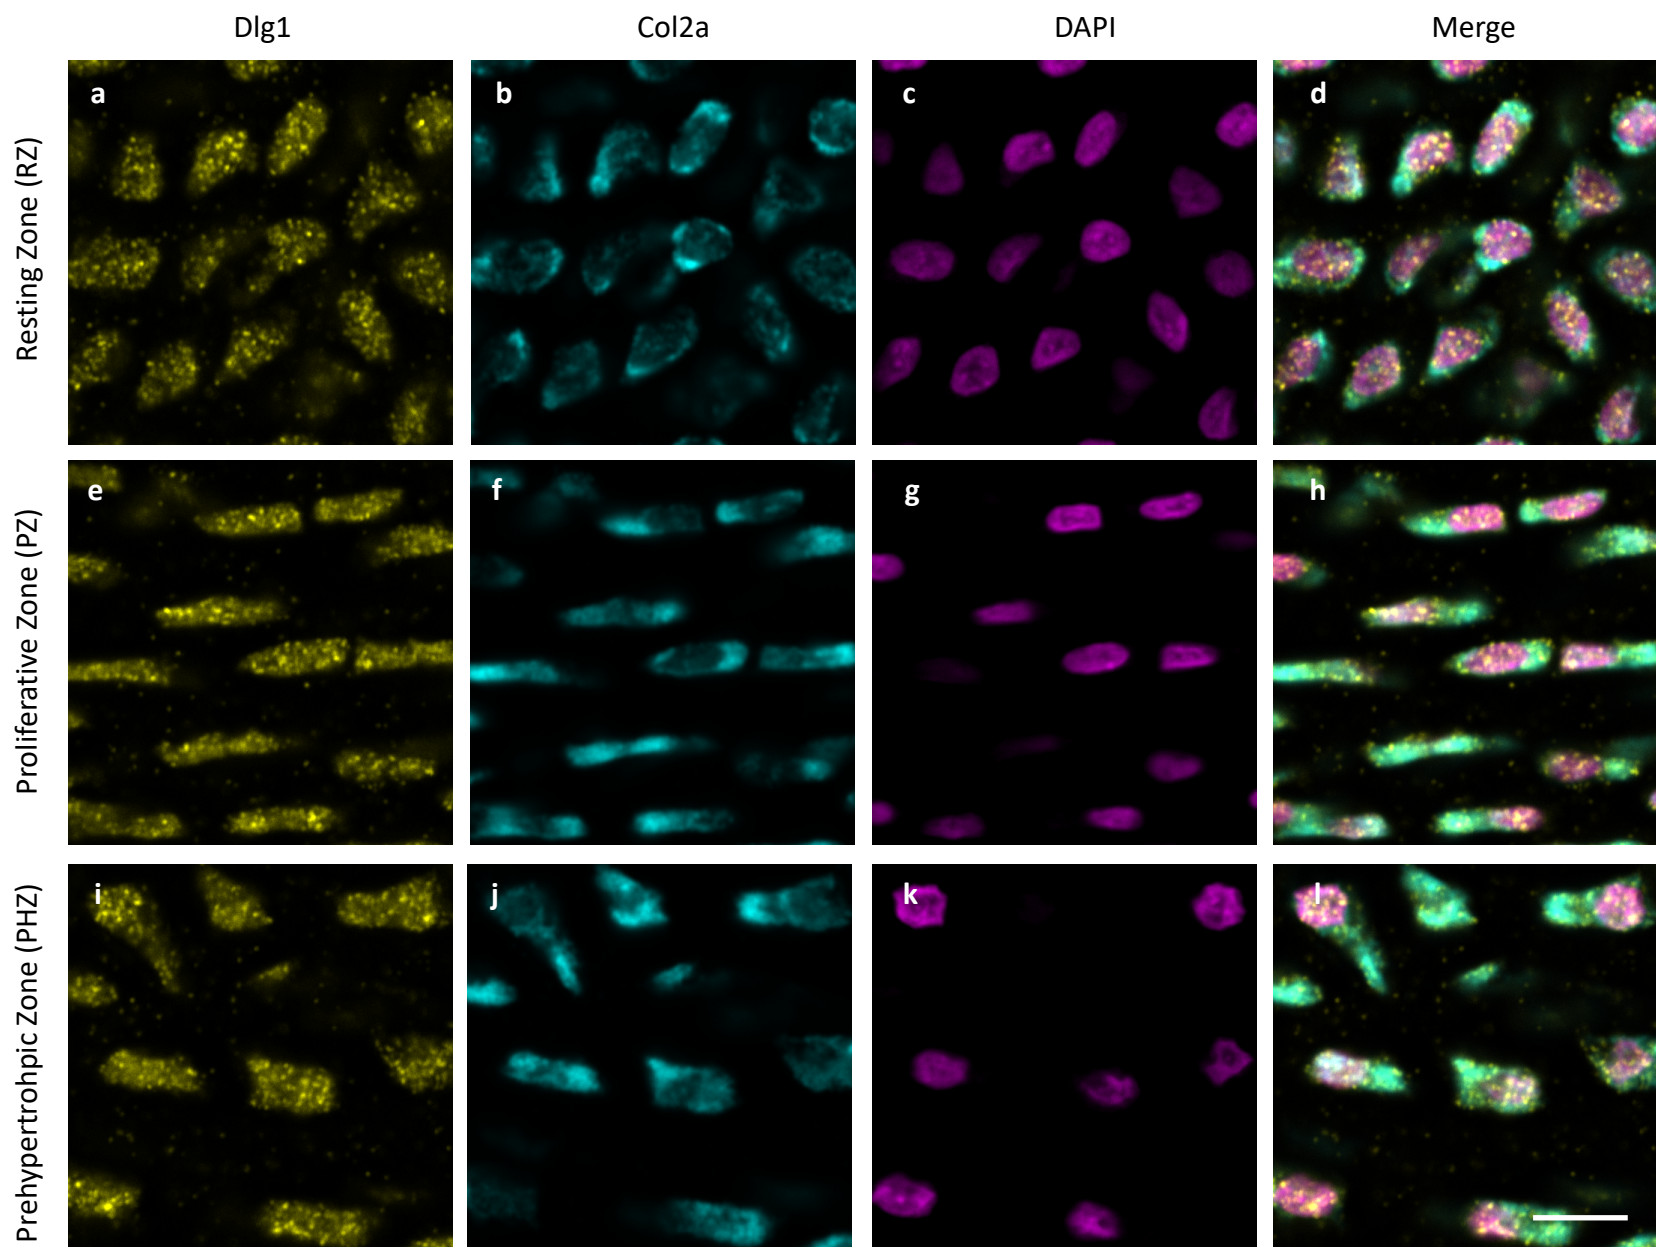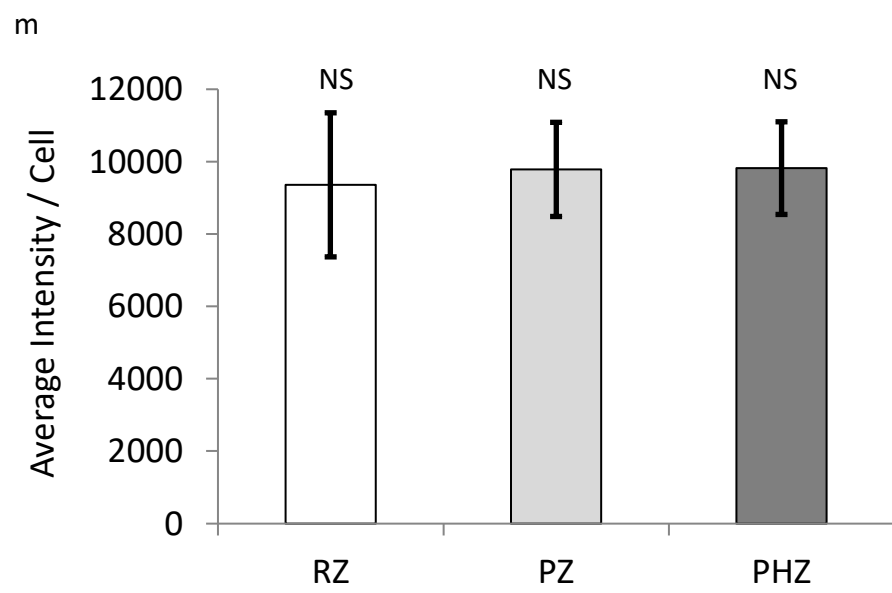

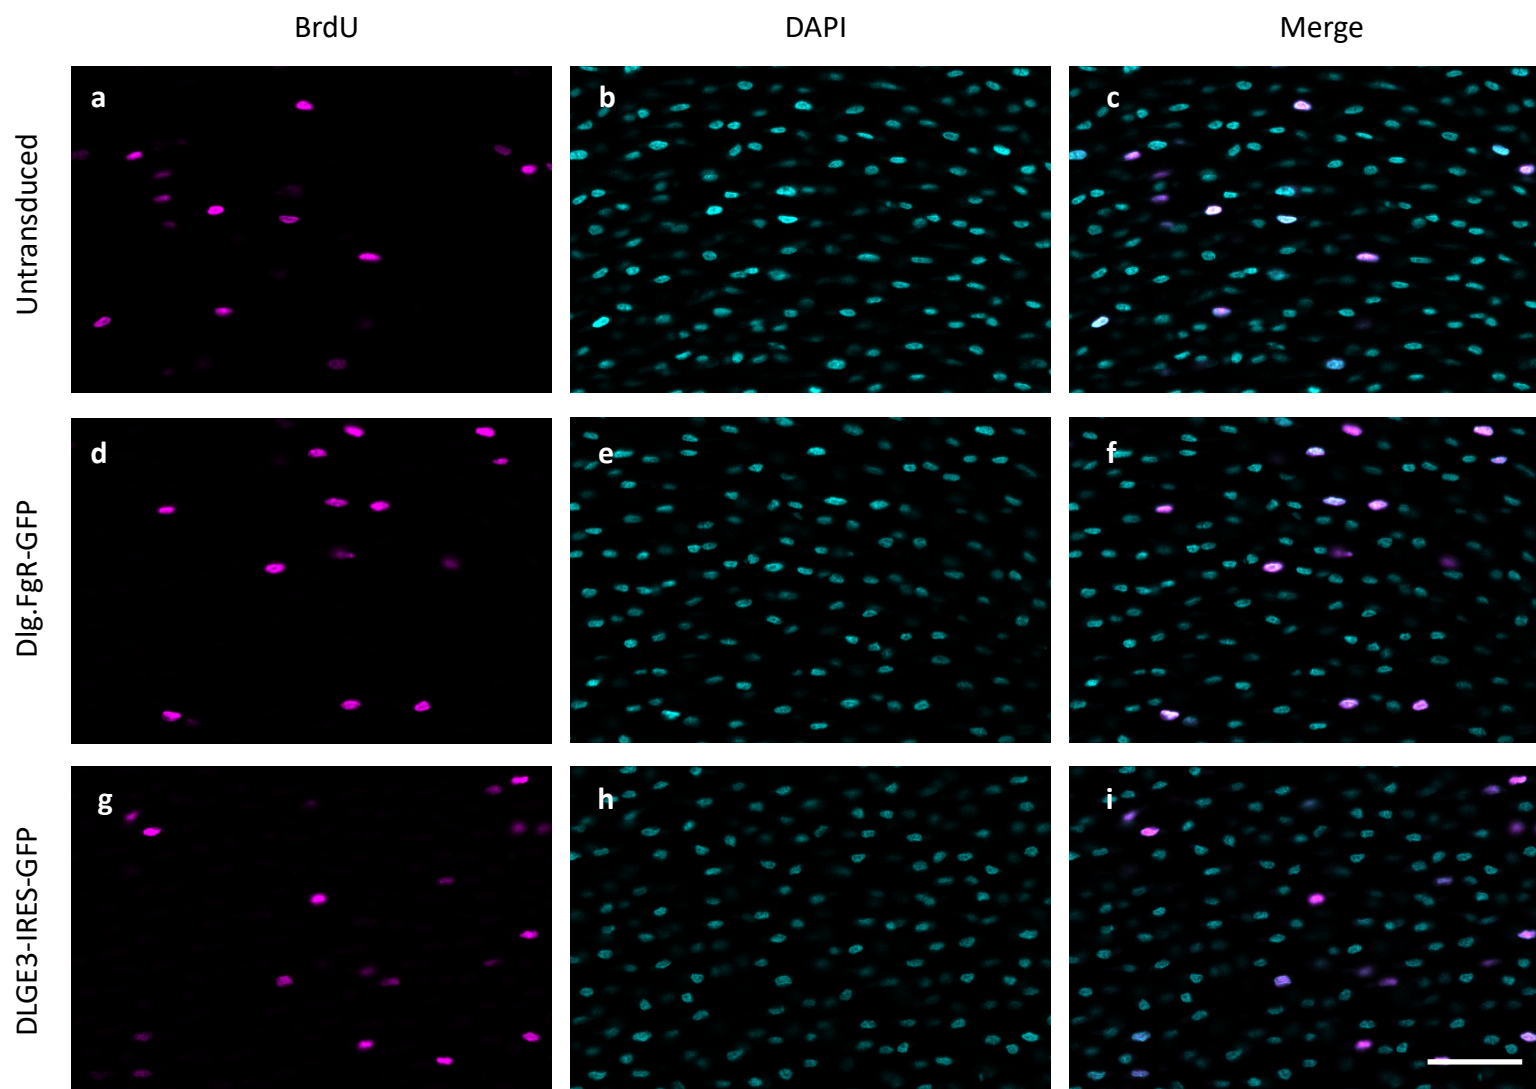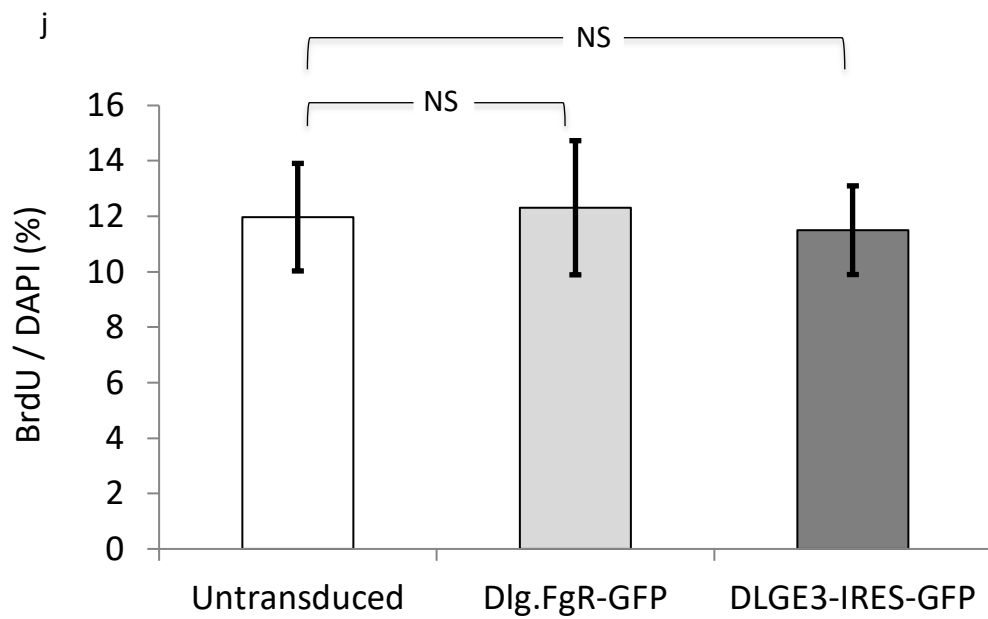



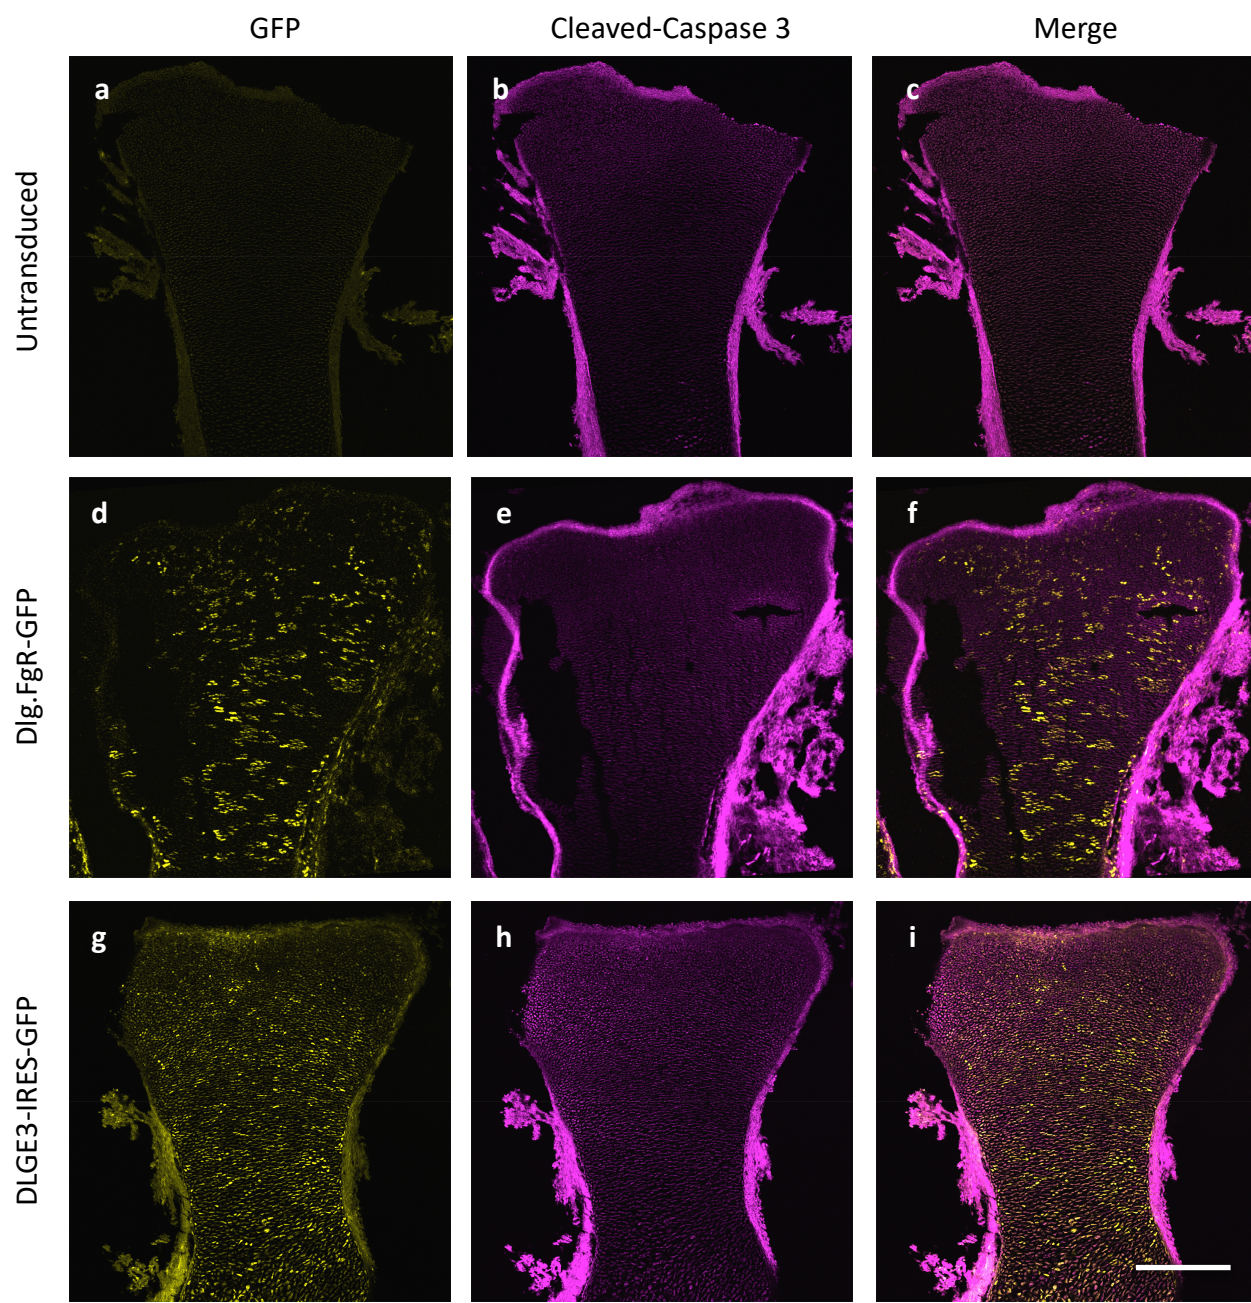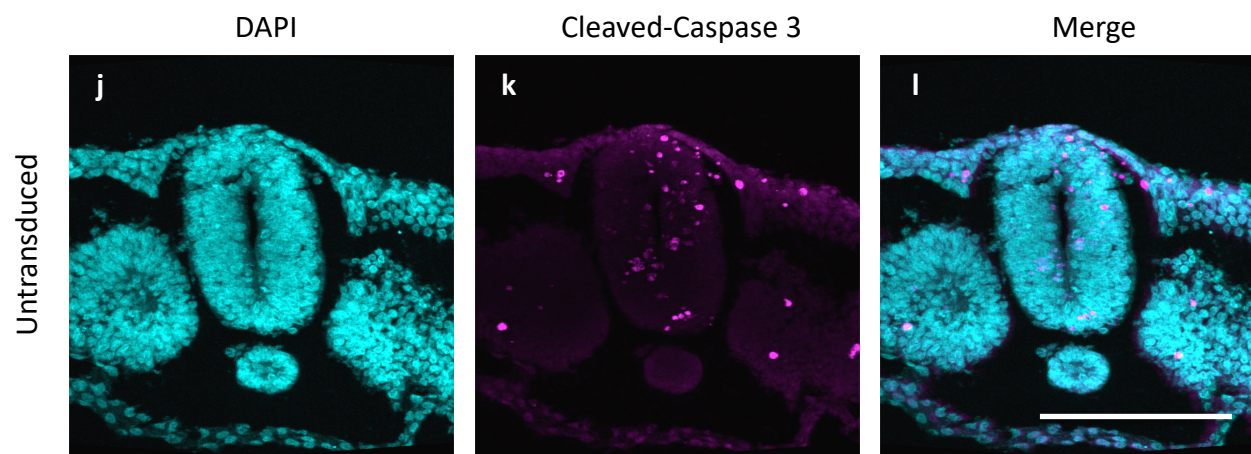



Col2a

Ihh

Merge

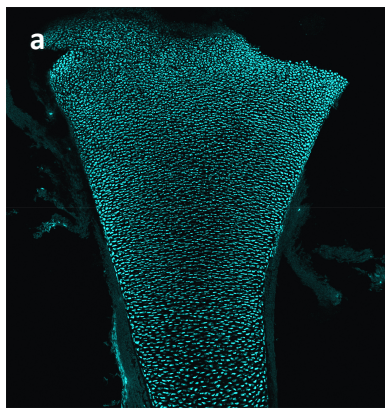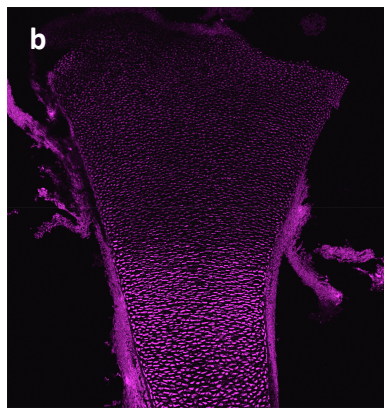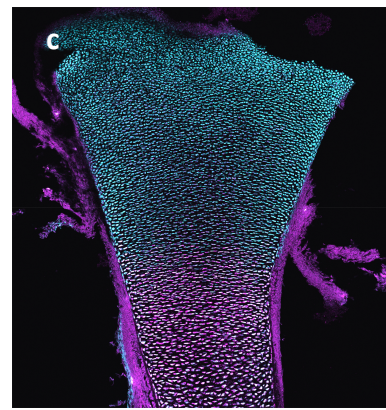

j

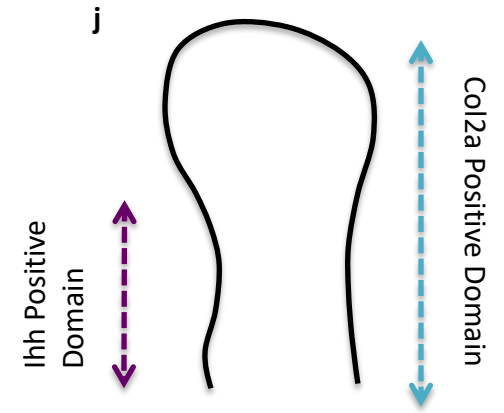

Fractional Length =

$$\frac{\text{Length of Ihh Positive Domain}}{\text{Length of Col2a Positive Domain}}$$

Untransduced

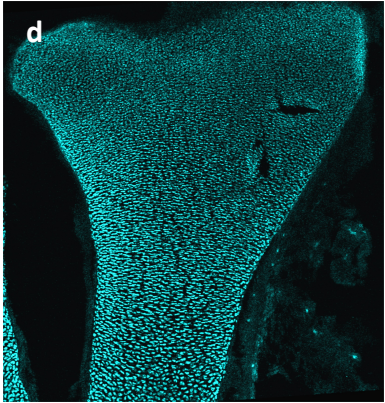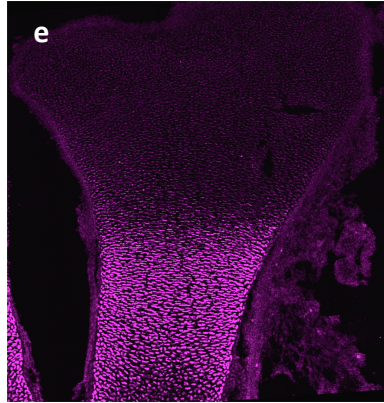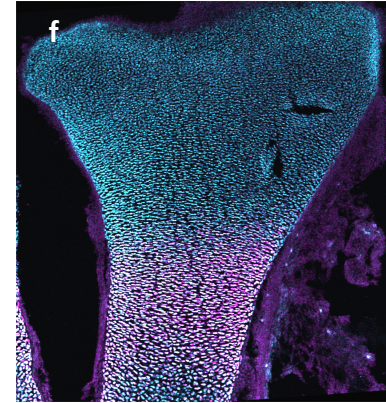

Dlg.FgR-GFP

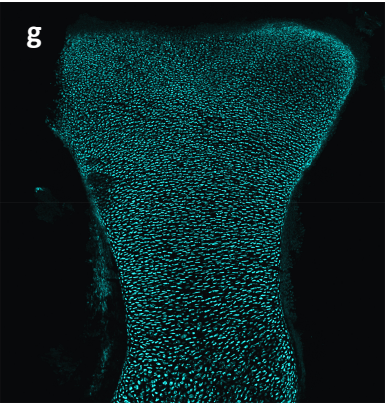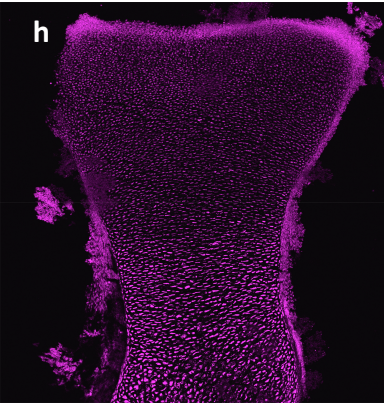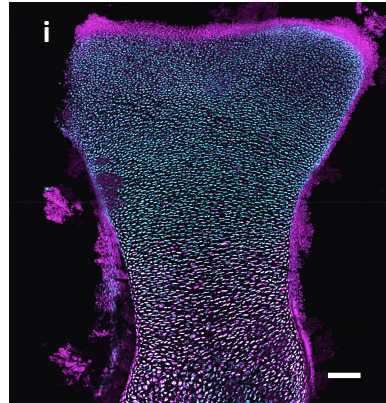

DLGE3-IRES-GFP

k

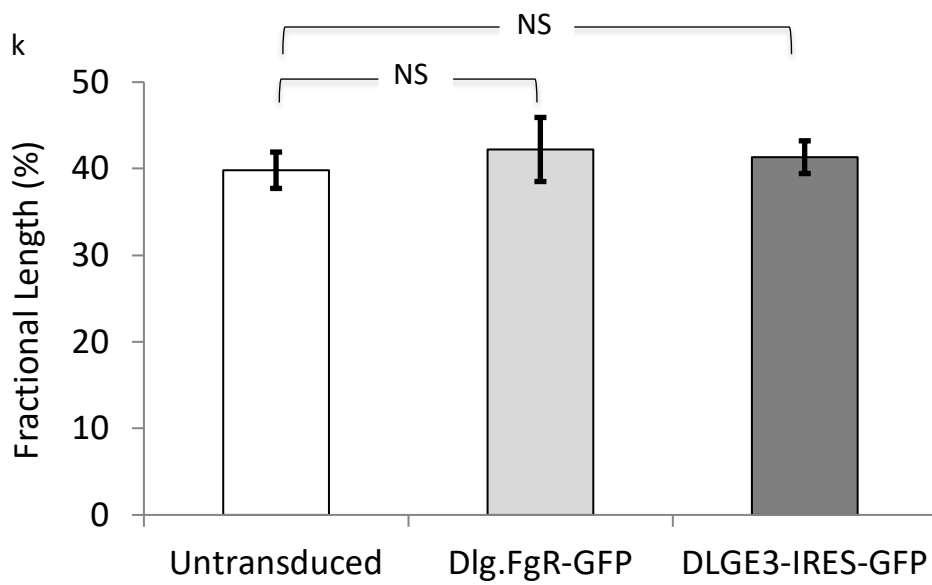

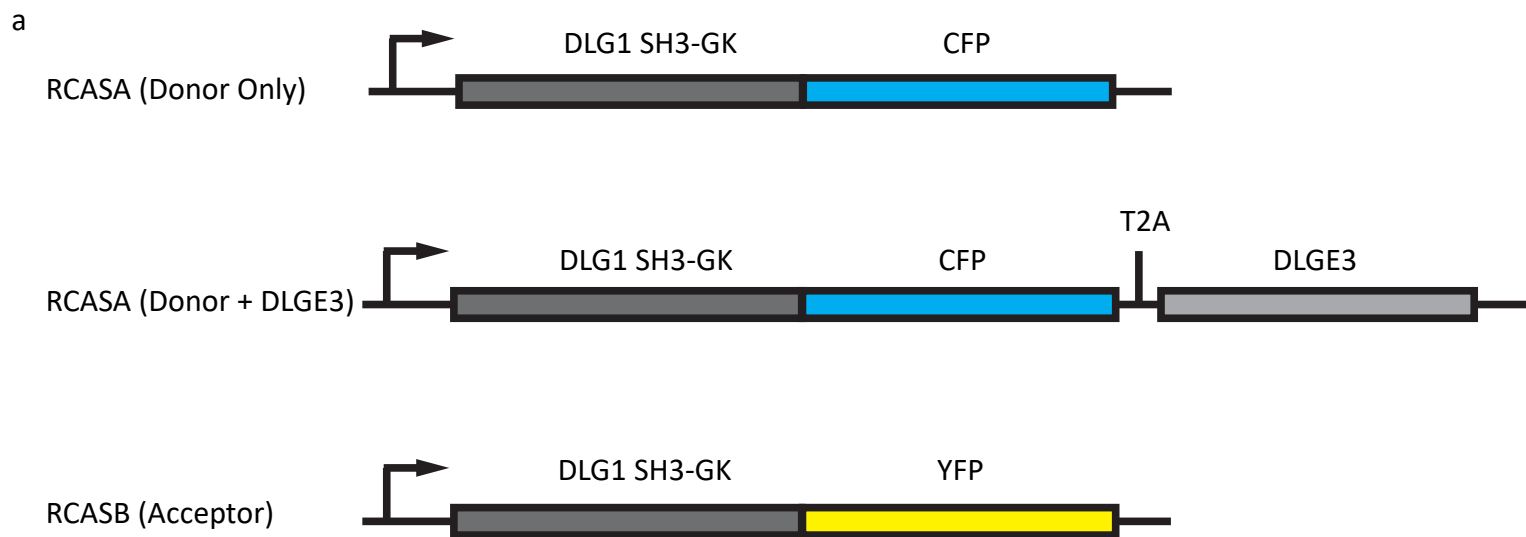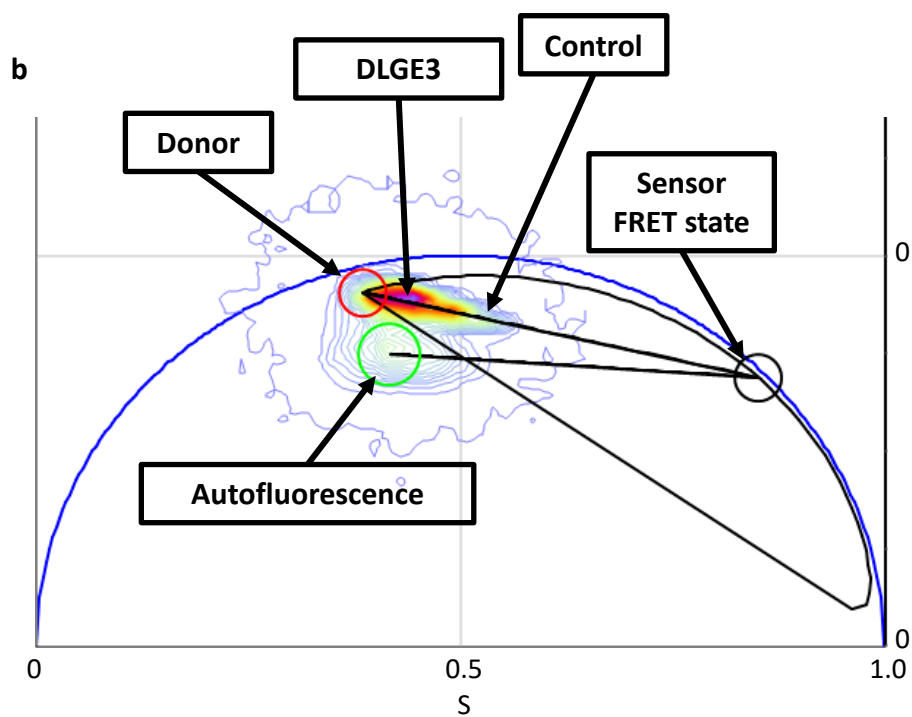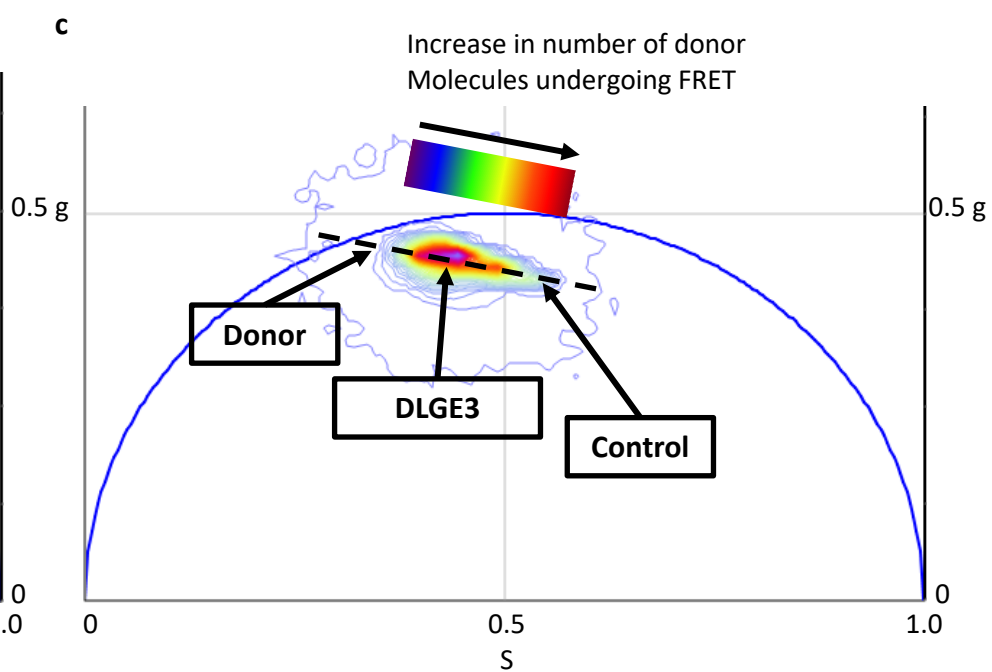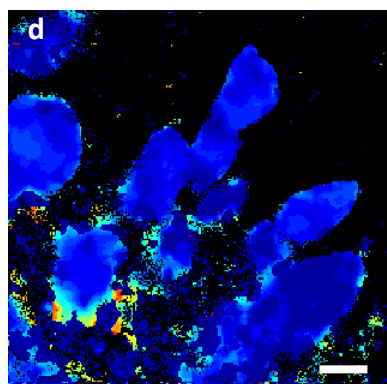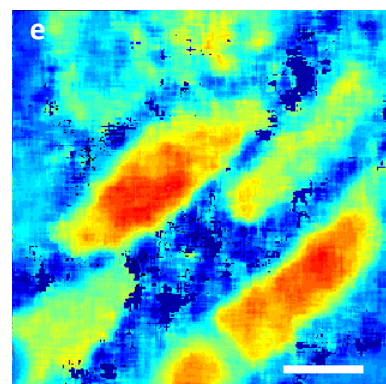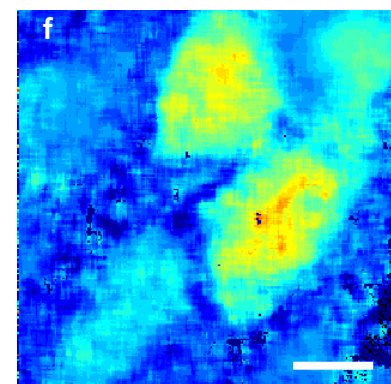



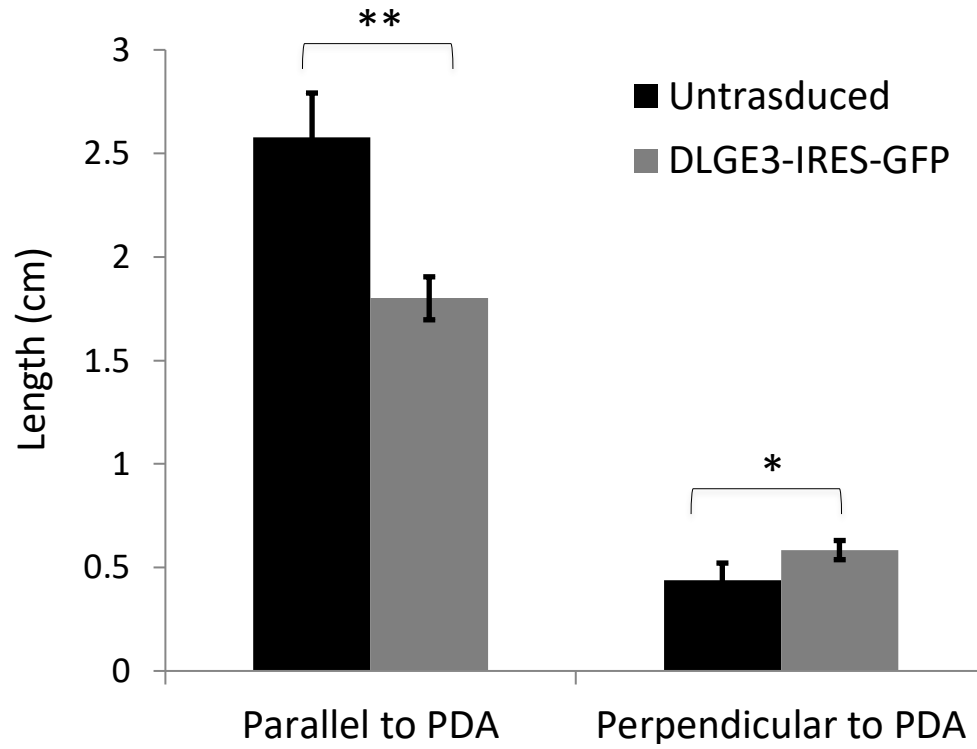

*Dlg1* +/+

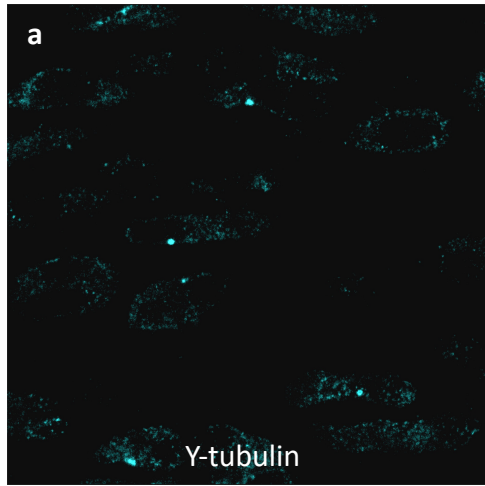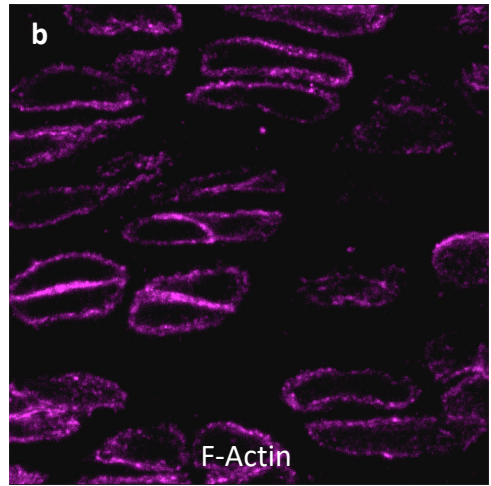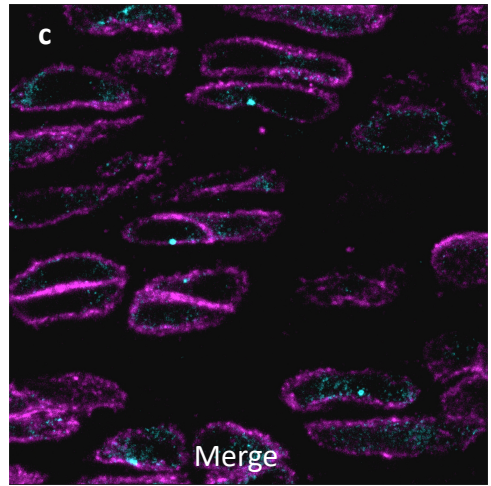

*Dlg1* -/-

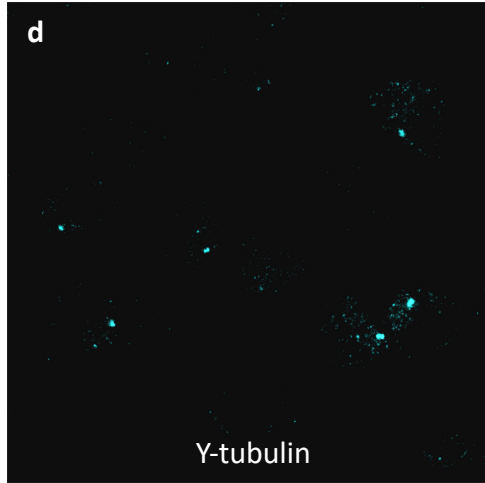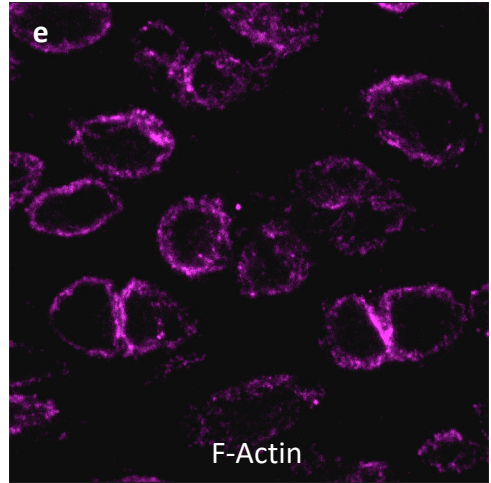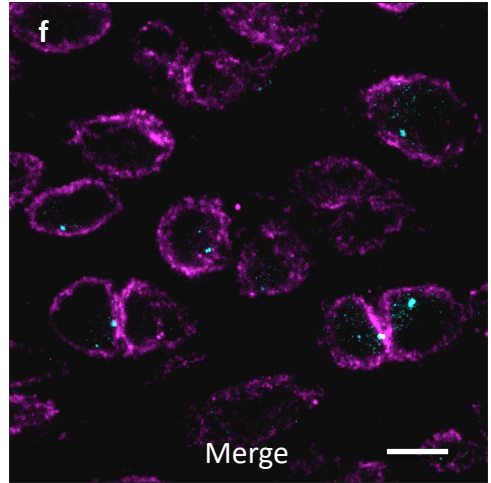

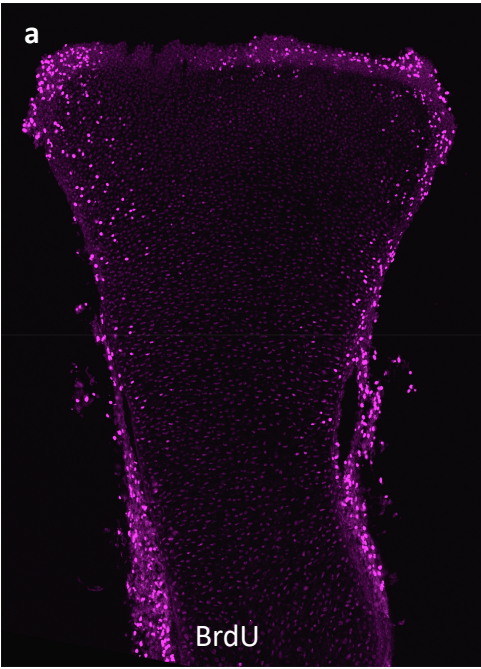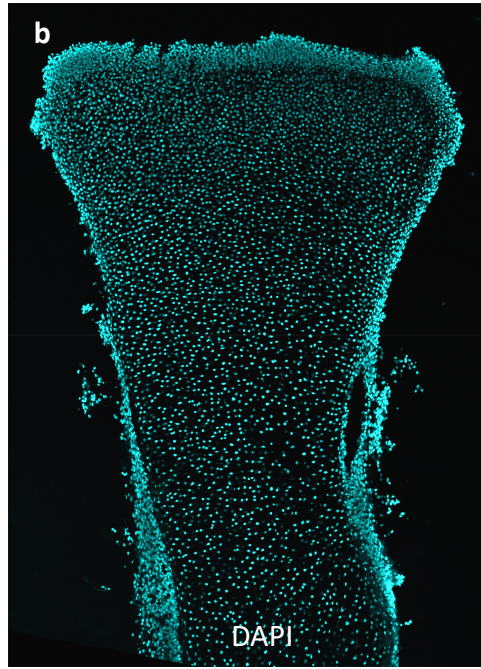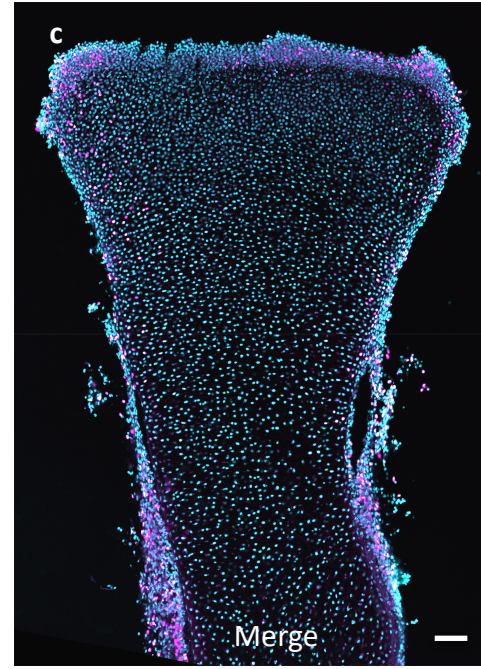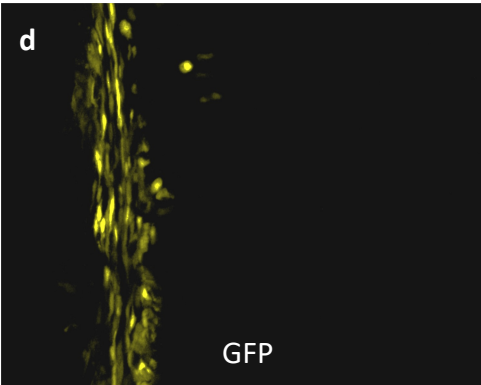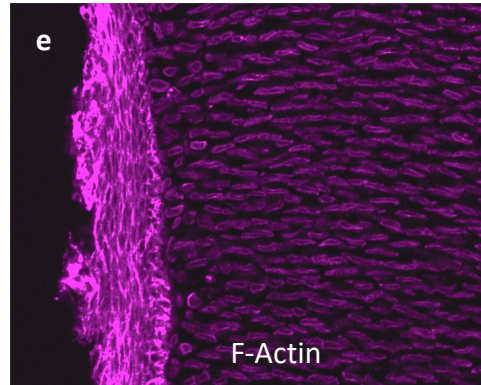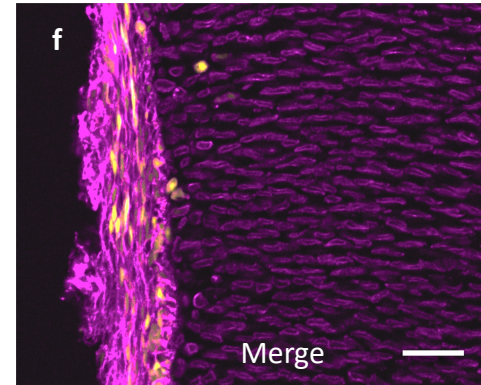



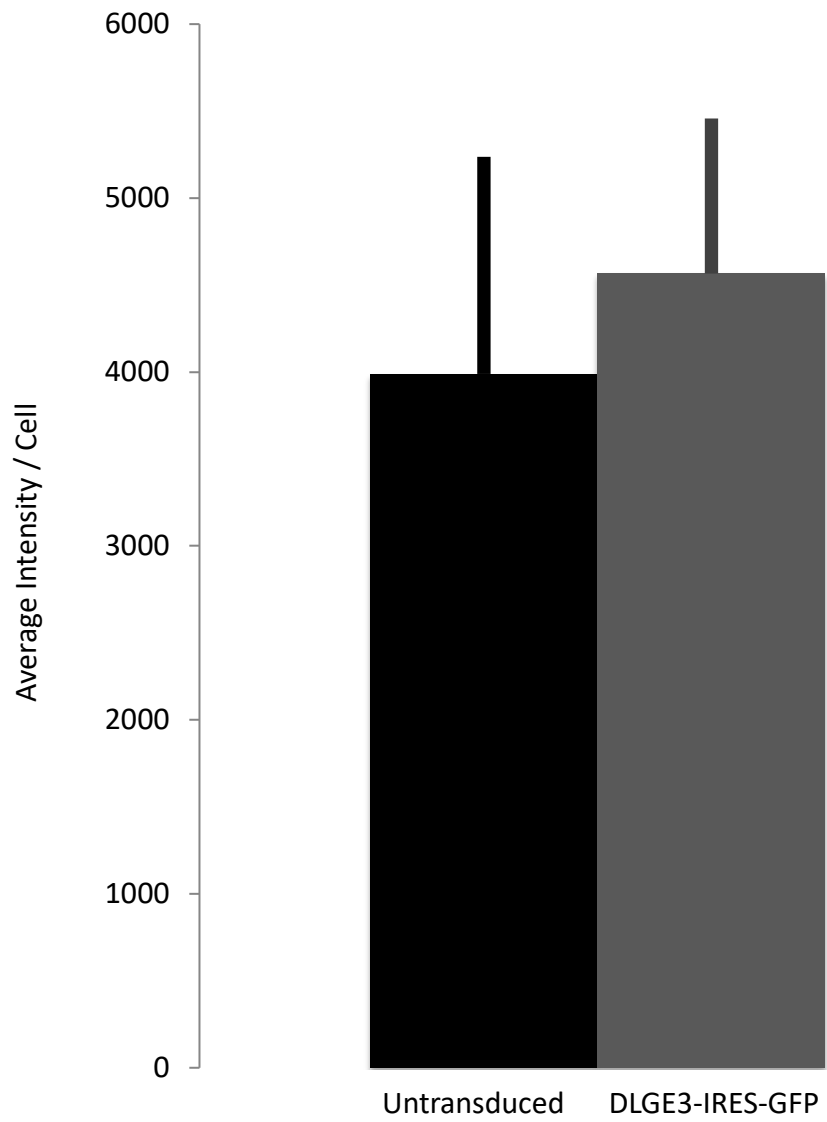

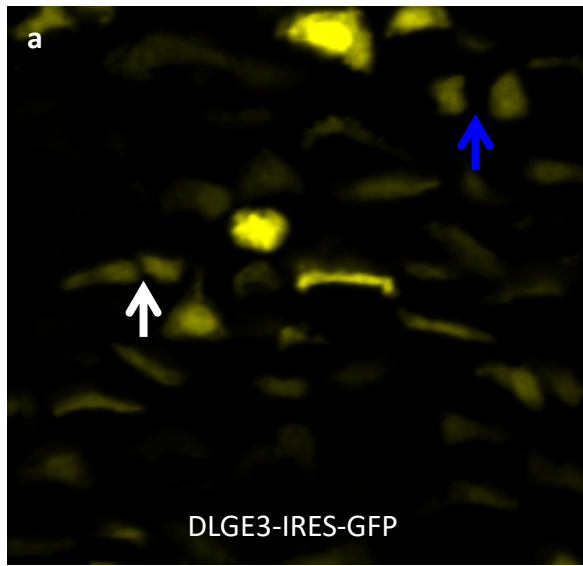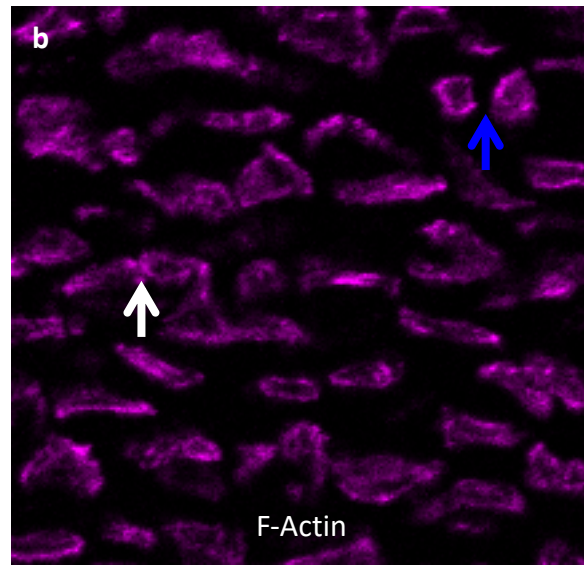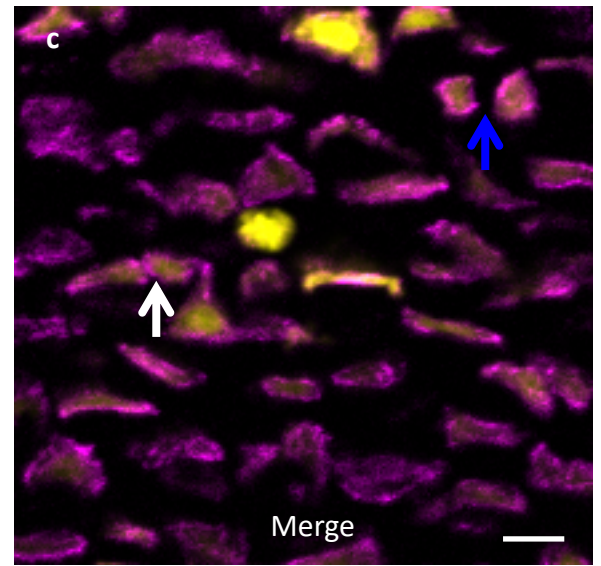

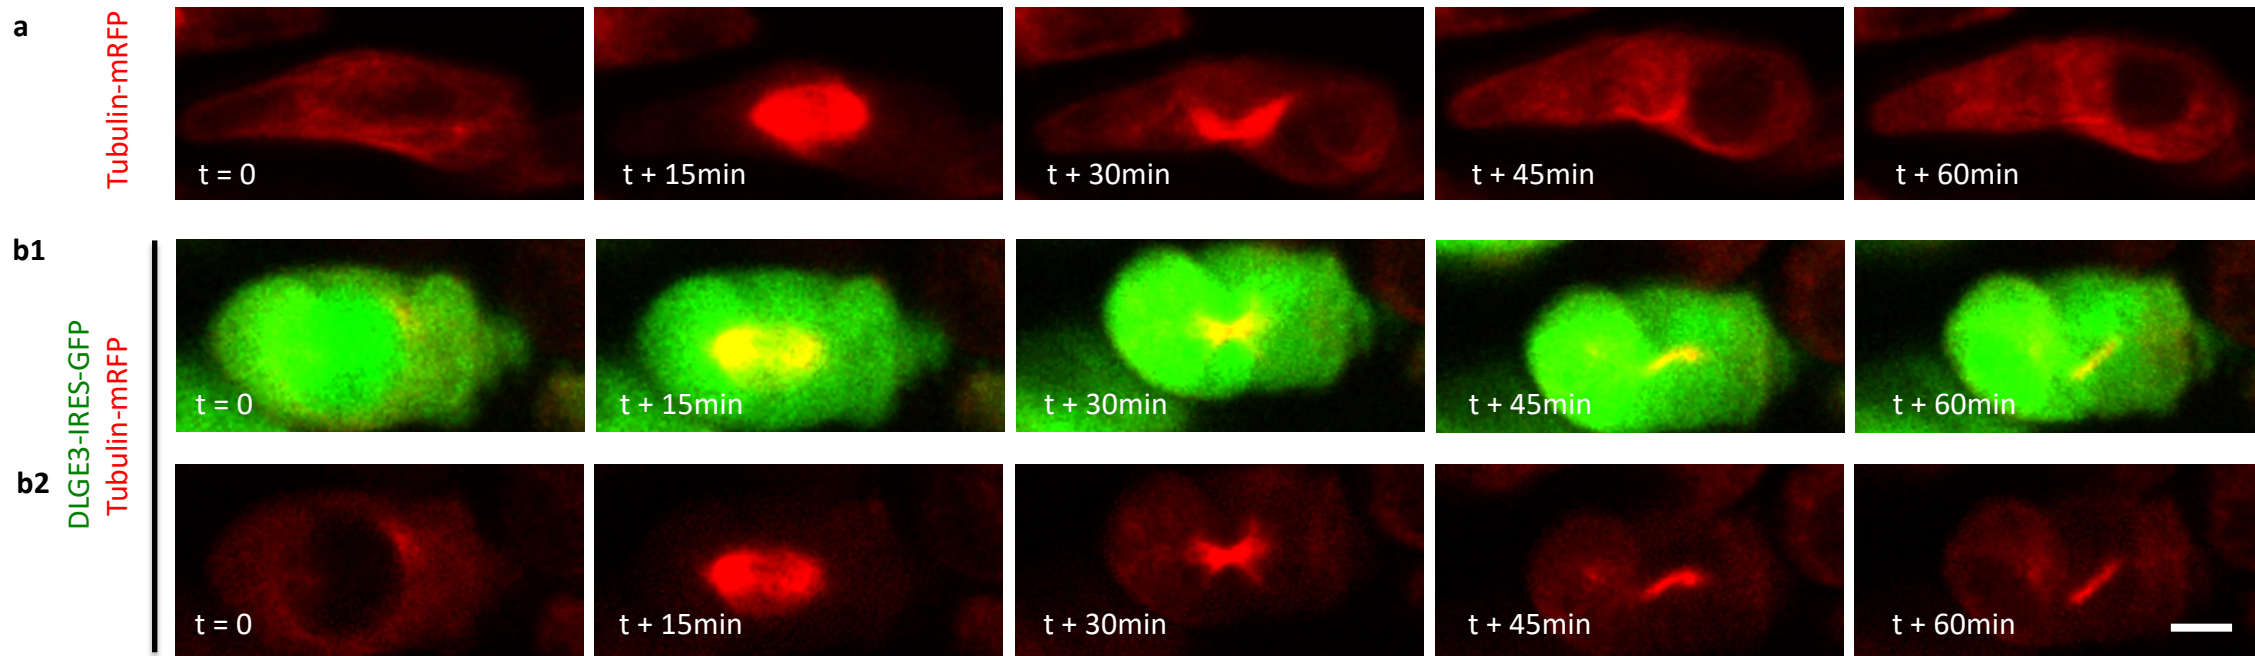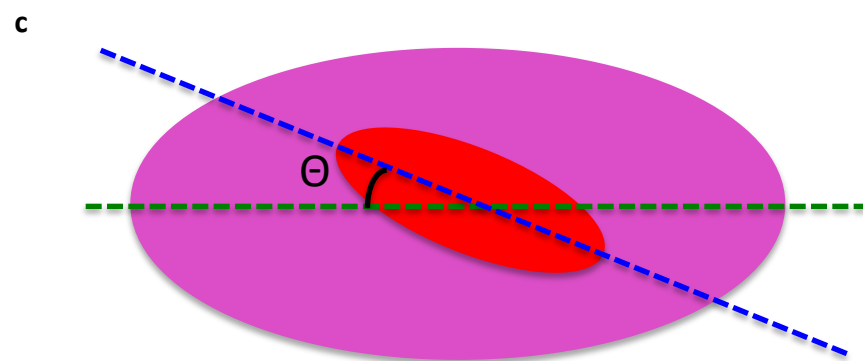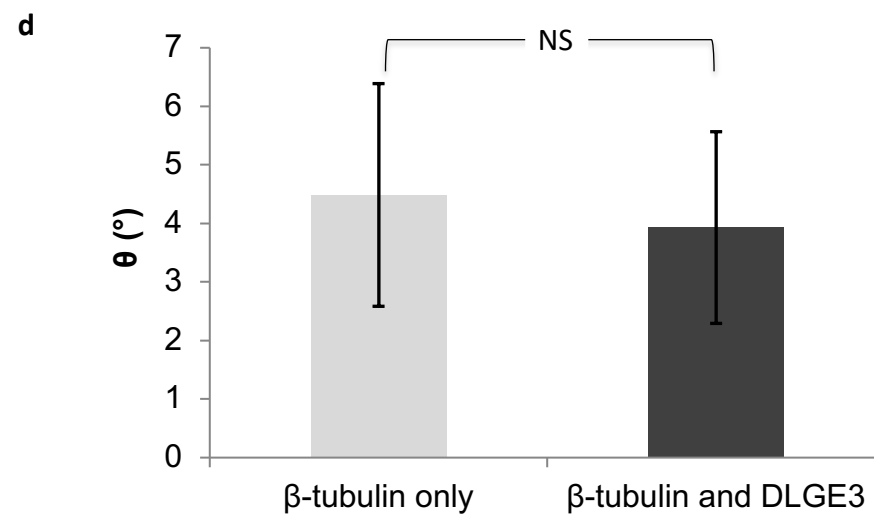



IP Ab: mouse anti-pan-MAGUK

Blot primary Ab: mouse anti-Beta-catenin

Blot secondary Ab: goat anti-mouse IgG (H+L) Alexa780

1: chondrocyte lysate

2: IP from lysate

Arrow: Beta-catenin

Arrowhead: mouse IgG (H+L chains)

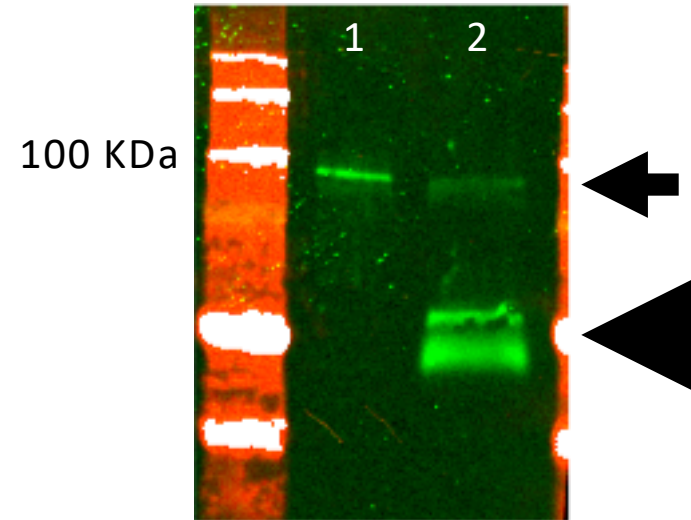

**Supplemental Table S1. Mass spectroscopic analysis of E13.5 chicken humerus cartilage.** Proteins ~80-125 kDa were identified from SDS-page gel electrophoresis samples. Dlg1 was moved to the top of this partial list to highlight its presence in the analysis and is the only MAGUK identified. A comprehensive list from this analysis will be made available.

| Fasta headers                                               | Mol. Wt. [kDa] | Score  | Intensity  | iBAQ     | Protein IDs |
|-------------------------------------------------------------|----------------|--------|------------|----------|-------------|
| <b>Discs large MAGUK scaffold protein 1</b>                 | 97.307         | 1.7324 | 2467300    | 68535    | A0A1D5P102  |
| <b>Endoplasmic</b>                                          | 91.213         | 214.99 | 3050400000 | 78214000 | A0A1L1S093  |
| <b>Nucleolin</b>                                            | 75.399         | 17.71  | 839190000  | 27071000 | A0A1D5NZ30  |
| <b>Heat shock cognate protein HSP 90-beta</b>               | 80.018         | 62.096 | 553000000  | 16265000 | A0A1D5PHC5  |
| <b>Valosin containing protein</b>                           | 89.324         | 36.374 | 635690000  | 14127000 | Q5ZMU9      |
| <b>Gelsolin</b>                                             | 85.831         | 27.765 | 361720000  | 10639000 | O93510      |
| <b>Procollagen-lysine,2-oxoglutarate 5-dioxygenase 2</b>    | 87.01          | 46.35  | 338700000  | 7876700  | F1NXB0      |
| <b>Interleukin enhancer binding factor 3</b>                | 66.548         | 34.155 | 197030000  | 6356000  | A0A1D5PR95  |
| <b>Alpha-actinin-4</b>                                      | 91.294         | 30.619 | 295330000  | 6027200  | A0A1D5P522; |
| <b>Heterogeneous nuclear ribonucleoprotein U</b>            | 91.61          | 56.076 | 207830000  | 5937900  | F1NSP8      |
| <b>Decorin</b>                                              | 39.686         | 17.778 | 111390000  | 5862700  | P28675      |
| <b>Histone H1.01</b>                                        | 22.044         | 17.992 | 38079000   | 5439800  | P08284      |
| <b>Karyopherin subunit beta 1</b>                           | 119.94         | 2.1553 | 267130000  | 5137100  | A0A1D5P1W7  |
| <b>MICOS complex subunit MIC60</b>                          | 79.223         | 55.089 | 196130000  | 4669800  | F1P3U1      |
| <b>Prolyl 3-hydroxylase 1</b>                               | 81.675         | 8.4901 | 155860000  | 4584300  | Q6JHU8      |
| <b>Aconitate hydratase, mitochondrial</b>                   | 84.678         | 7.1322 | 148440000  | 4366000  | A0A1D5PZ66  |
| <b>Alpha-actinin-1</b>                                      | 102.43         | 29.224 | 229010000  | 4240900  | A0A1D5P9P3  |
| <b>Cell cycle associated protein 1</b>                      | 77.987         | 15.544 | 88603000   | 4219200  | Q5XNV3      |
| <b>Lysosome-associated membrane glycoprotein 1</b>          | 10.132         | 4.6538 | 13536000   | 3384000  | A0A1L1S0W8  |
| <b>Splicing factor 3a subunit 1</b>                         | 88.486         | 67.007 | 133530000  | 3256800  | F1NU16      |
| <b>26S proteasome non-ATPase regulatory subunit 1</b>       | 106.06         | 12.267 | 145340000  | 3092400  | Q5F418      |
| <b>Far upstream element-binding protein 2</b>               | 80.643         | 33.489 | 128910000  | 3069400  | Q8UVD9      |
| <b>DNA topoisomerase 1</b>                                  | 89.693         | 37.893 | 114840000  | 3022100  | R4GM79      |
| <b>Catenin alpha 1</b>                                      | 100.04         | 24.757 | 138950000  | 2956400  | A0A1D5P7X0  |
| <b>Integrin beta</b>                                        | 88.399         | 15.851 | 106430000  | 2956300  | A0A1D5PNB4  |
| <b>Aspartate beta-hydroxylase</b>                           | 80.122         | 7.0537 | 92353000   | 2886000  | A0A1D5PAN4  |
| <b>Adseverin</b>                                            | 78.852         | 23.396 | 110590000  | 2835600  | A0A1D5PBC3  |
| <b>Programmed cell death 6 interacting protein</b>          | 97.314         | 11.72  | 132960000  | 2770100  | Q5ZJ70      |
| <b>Cold shock domain-containing protein E1</b>              | 88.631         | 41.571 | 119940000  | 2725900  | E1BQF9      |
| <b>Eukaryotic translation initiation factor 3 subunit B</b> | 85.318         | 3.2831 | 97679000   | 2713300  | A0A1D5PTG6  |
| <b>Dynamin 1</b>                                            | 97.234         | 20.281 | 116480000  | 2377000  | E1BXY4      |

---

sup movie 1 images.pdf

753 x 185

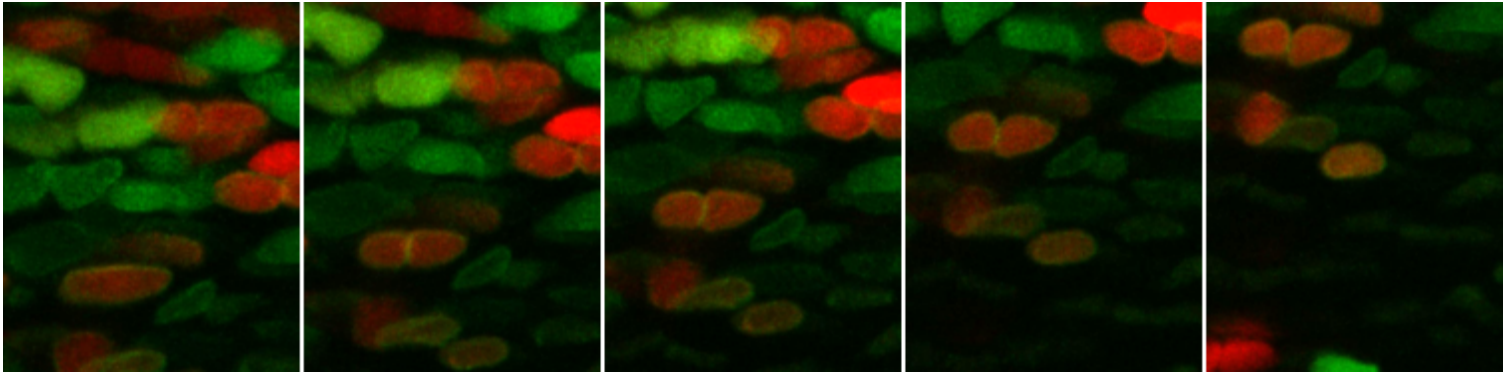



---

sup movie 2 images.pdf

646 x 322

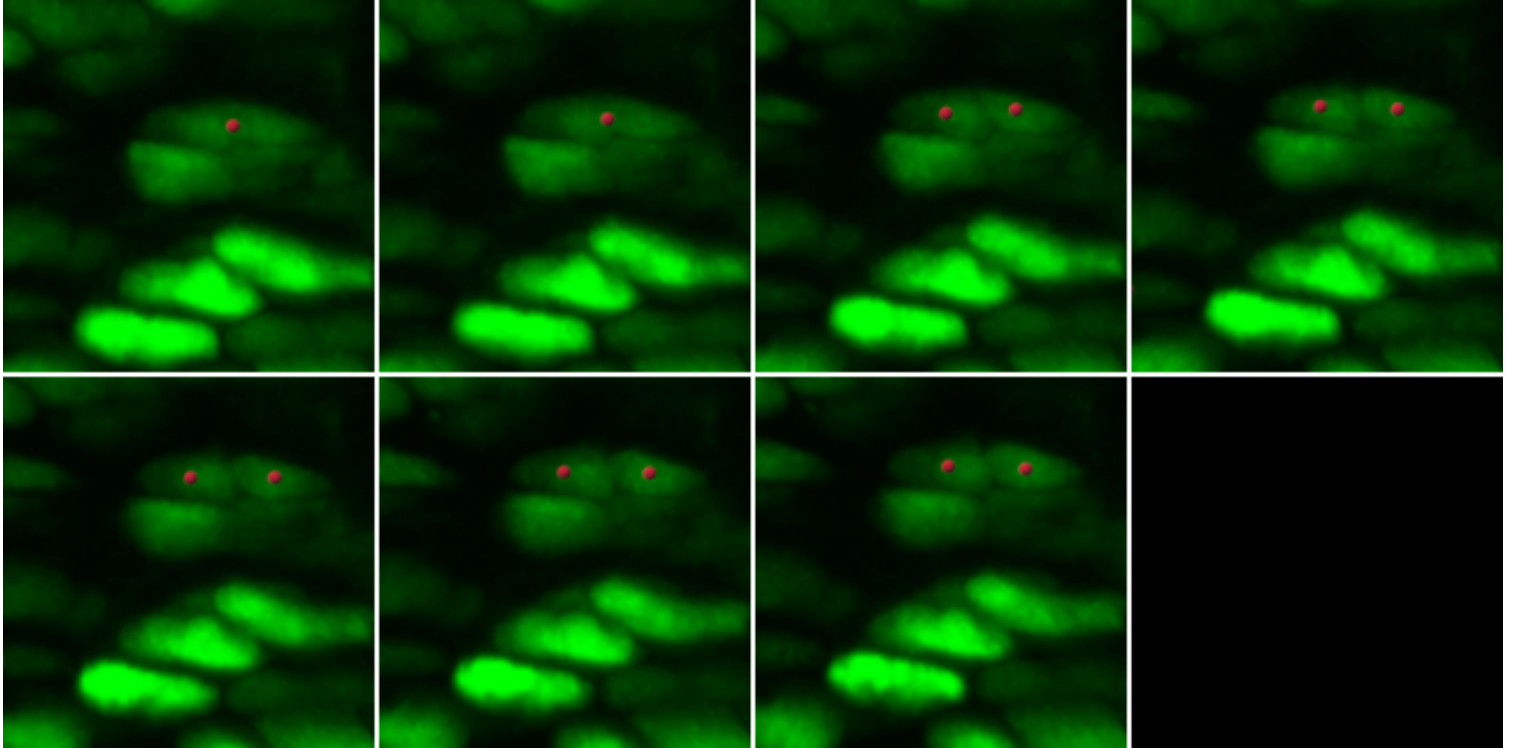

---

sup movie 3 images.pdf

646 x 322

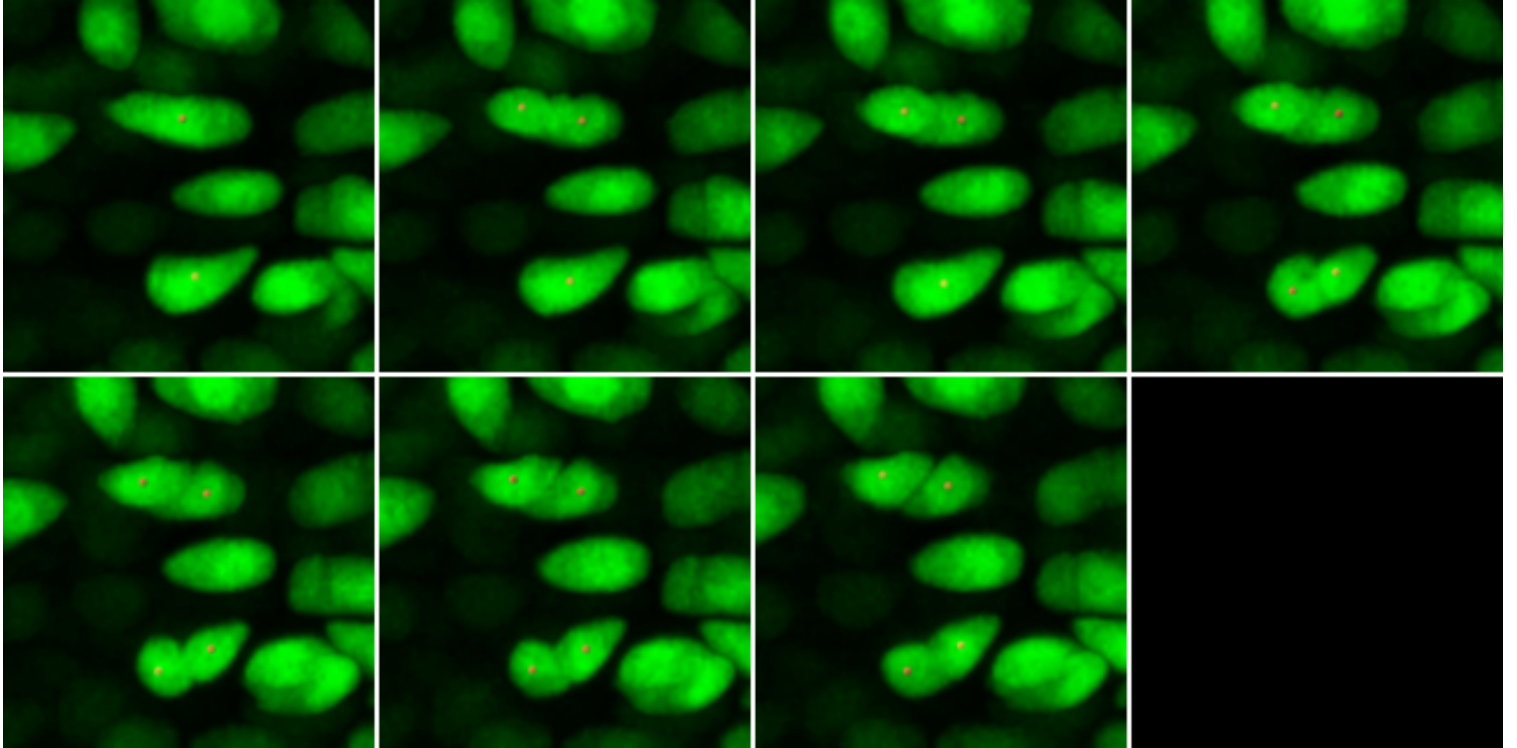

### **Supplemental Figure 1. Dlg1 mRNA is expressed in distinct zones of cartilage**

High magnification images of chick humeri hybridized with anti-Dlg1 probes (a, e, i), anti-Col2a probes (b, f, j, marker of chondrocytes) and stained with DAPI (c, g, k). Dlg1 mRNA is expressed in both nucleus and cytoplasm (a-l). Fluorescent quantification of Dlg1 mRNA showed that it is uniformly expressed in the resting (RZ), proliferative (PZ) and prehypertrophic zones (PHZ) (m). N = 5 humeri. NS denotes no significant difference (T-test). Scale bar: 15  $\mu\text{m}$ .

**Supplemental Table S1. Mass spectroscopic analysis of E13.5 chicken humerus cartilage.** Proteins ~80-125 kDa were identified from SDS-page gel electrophoresis samples. Dlg1 was moved to the top of this partial list to highlight its presence in the analysis and is the only MAGUK identified. A comprehensive list from this analysis will be made available.

### **Supplemental Figure 2. Exogenous Dlg.FingR and DLGE3 do not affect normal mitotic cell division in the proliferative zone of cartilage**

BrdU and DAPI staining was performed on untransduced chicken humeri (a-c), humeri expressing Dlg.FingR-GFP (d-f) and humeri expressing DLGE3-IRES-GFP (g-i). The similar ratio between BrdU and DAPI positive cells in different conditions (j) suggests mitotic cell division was not significantly impacted by the expression of Dlg.FingR or DLGE3. N = 5 untransduced, 5 Dlg.FingR-GFP expressing and 5 DLGE3-IRES-GFP expressing humeri. NS denotes no significant difference (T-test). Scale bar: 70  $\mu\text{m}$ .

### **Supplemental Figure 3. Exogenous Dlg.FingR and DLGE3 do not cause apoptosis in cartilage**

Untransduced chicken humeri (a-c), humeri expressing Dlg.FingR-GFP (d-f) and humeri expressing DLGE3-IRES-GFP (g-i) did not contain any apoptotic chondrocytes, as demonstrated by

immunofluorescence using anti-cleaved-caspase 3 antibody (b, e, h). As a positive control, this antibody detected apoptotic cells inside chicken neural tube and somite (j-l). N = 5 untransduced, 5 Dlg.FingR-GFP expressing and 5 DLGE3-IRES-GFP expressing humeri. Scale bars: 150  $\mu$ m.

#### **Supplemental Figure 4. Exogenous Dlg.FingR and DLGE3 do not affect normal chondrocyte differentiation in cartilage**

HCR was performed on the adjacent tissues sections used in Supplemental figure 3; these samples include untransduced chicken humeri (a-c), humeri expressing Dlg.FingR-GFP (d-f) and humeri expressing DLGE3-IRES-GFP (g-i). Col2a (a, d, g) and Ihh (b, e, h) was the marker for all chondrocytes and prehypertrophic chondrocytes, respectively. Cell differentiation rate was determined by the fractional length between Ihh and Col2a positive domains (j). The similar fractional length in different conditions (k) show Dlg.FingR-GFP and DLGE3-IRES-GFP do not affect normal cell differentiation. N = 5 untransduced, 5 Dlg.FingR-GFP expressing and 5 DLGE3-IRES-GFP expressing humeri. NS denotes no significant difference (T-test). Scale bars 150  $\mu$ m.

#### **Supplemental Figure 5. FLIM-FRET showing DLGE3 prevents Dlg1 multimerization in cartilage**

(a) Construction of retroviral vector harboring Dlg1 FRET sensor. Donor with or without DLGE3 was subcloned into RCAS virus coated with envelope type-A protein. Acceptor was subcloned into the virus coated with envelope type-B protein. Coinfection of both viruses permitted donor and acceptor to be expressed within the same chondrocytes. In some cases, cells were transduced by one virus, which were used as internal controls. The transduced chicken metacarpals were explanted for FLIM-FRET analysis. (b-d) Phasor plot of fluorescence lifetime (b) and sensor populations undergoing FRET (c) in multiple chondrocytes showed similar but more dramatic distribution patterns to the phasor analysis of portions of

chondrocytes in Fig. 3d-i. This phasor includes measurements from chondrocytes expressing donor only (d), FRET sensor without (e) and with DLGE3 (f). Scale bars = 5  $\mu\text{m}$ .

### **Supplemental Figure 6. Dlg1 is required for normal dimensions of cartilage**

Compared with untransduced chicken cartilage, the ones expressing DLGE3 is shorter (parallel to PDA) and wider (perpendicular to PDA). \*\* denotes significant difference (T-test). N is 10 and 8 for untransduced and DLGE3 expressing tissues, respectively.

### **Supplemental Figure 7. Dlg1 is required for normal chondrocyte cell polarity in mouse**

Similar analysis of MTOCs orientation in chick (Figure 5a-i) was performed in mice humerus. In wild-type mice, MTOCs were distributed on the longitudinal sides of cells (a-c). In contrast, MTOCs was misoriented in *Dlg1*<sup>-/-</sup> mice (d-f). N = 3 wild-type and 5 *Dlg1*<sup>-/-</sup> humeri Scale bar: 10  $\mu\text{m}$ .

### **Supplemental Figure 8. Dlg1's function in the perichondrium/periosteum is not required for chondrocyte cell polarity**

To determine whether chondrocyte cell polarity is affected by Dlg1's function in neighboring tissue, mosaic analysis in chicken was performed. During infection, RCAS RNA can only enter host nuclei during mitosis when nucleus membrane is broken. Hence, the more active cell division, the more likely viral RNA integrates into host chromosomes. As shown by short-pulse (2 hours) BrdU labeling in chicken cartilage, whereas many perichondrium/periosteum cells incorporated BrdU, chondrocytes did not (a-c), a sign that perichondrium/periosteum cells divide faster than chondrocytes. As a result, the very low titer virus ( $1 \times 10^7$ ) expressing RCAS-DLGE3-IRES-GFP did not transduce chondrocytes, but still transduce

the perichondrium/periosteum (d). Normalization to phalloidin signal revealed normal chondrocyte cell morphologies within these mosaic limbs (e). N = 4 transduced humeri. Scale bar: 35  $\mu$ m.

### **Supplemental Figure 9. Immunostaining reveals DLGE3 does not significantly reduce Dlg1 protein**

(a) Densitometric analysis of Dlg1 immunostaining shows there is no significant difference in Dlg1 abundance between those chondrocytes expressing DLGE3 ( $4566 \pm 892$  i.u./cell) and the untransduced control cells ( $3989 \pm 1248$  i.u./cell). N = 60 cells quantified per condition, 20 cells from 3 staining experiments.

### **Supplemental Figure 10. Chondrocytes expressing DLGE3 display oriented division but generate daughter cells with abnormal morphology**

Chicken cartilage expressing DLGE3-IRES-GFP (a) was stained with phalloidin (b). A transduced mitotic cell had a normal contractile ring at the midbody and normal division orientation (white arrows). However, two transduced and separated daughter cells, inferred based on their relative positions, became abnormally shaped (blue arrows). Scale bar: 10  $\mu$ m. N = 4 transduced chick humeri.

### **Supplemental Figure 11. Mitotic spindle is oriented along the elongation axes of mother cells during cell division**

(a-b) Time-lapse images representative of mitosing cells expressing  $\beta$ -tubulin-mRFP only (a) and the ones coexpressing DLGE3-IRES-GFP (b). The same cell was presented in the combined channels (b1) and in red channel only (b2) to show co-expression of DLGE3 (green) and spindle microtubules (red), respectively. In both a and b, during cell division, mitotic spindle appears to be parallel to the elongation axes of the mother cells (t + 15min). When the daughter cells were generated (t + 30min and afterwards), microtubules still maintained initial orientation in  $\beta$ -tubulin only expressing cells, but they appeared to be shifted in DLGE3 co-expressing cells. Scale bars: 3  $\mu$ m.



(c) Diagram showing the approach to measure spindle orientation during cell division ( $t = 15\text{min}$  in a and b). A straight line (dashed blue) was drawn to connect the two pointed ends of the elliptical shaped network formed by spindle microtubules (red). The angle ( $\theta$ ) between the dashed blue line and the long axis (green dashed line) of the mother cell (purple) was calculated.

(d) Statistical analysis demonstrated that spindle orientation during cell division is below 5 degree in the cells only expressing  $\beta$ -tubulin (a) ( $n = 16$ ) and the ones coexpressing DLGE3 (b) ( $n = 14$ ), confirming that chondrocytes divide along cell elongation axis and that Dlg1 is not required for cell division orientation. NS denotes no significant difference (T-test).

### **Supplemental Figure 12. $\beta$ -catenin co-immunoprecipitates with Dlg1 in chicken chondrocytes**

To determine the biochemical association between Dlg1 and  $\beta$ -catenin in chondrocytes, co-immunoprecipitation was performed on chicken humeri. Tissues at E8 were lysed and exposed to the anti-pan-MAGUK antibody. The resulting precipitates were run on a SDS-PAGE gel, blotted, and probed with anti- $\beta$ -catenin antibody. Lane 1 and 2 are whole lysates and IP lysates, respectively. This result is consistent with the previous finding of the interaction between Dlg1 and  $\beta$ -catenin (48).  $N = 7$  chick humeri.

### **Supplementary Movie 1**

Transverse view of chicken metacarpal expressing Dlg.FingR-GFP (green) and mCherry (red).

Pseudocolored snapshots of the dividing cell were presented in Figure 2h. Scale bar: 5  $\mu\text{m}$ .

### **Supplementary Movie 2**

Transverse view of chicken metacarpal expressing GFP. Snapshots of the dividing cell were presented in Figure 6a. Scale bar: 5  $\mu\text{m}$ .

### **Supplementary Movie 3**

Transverse view of chicken metacarpal expressing DLGE3-IRES-GFP. Snapshots of the dividing cells were presented in Figure 6b and c. Scale bar: 5  $\mu\text{m}$ .

### **Supplementary Movie 4**

Transverse view of chicken metacarpal expressing  $\beta$ -tubulin-mRFP. Snapshots of the dividing cell were presented in Supplemental Figure 11a. Scale bar: 5  $\mu\text{m}$ .

### **Supplementary Movie 5**

Transverse view of chicken metacarpal expressing  $\beta$ -tubulin-mRFP (red) and DLGE3-IRES-GFP (gree). Snapshots of the dividing cell were presented in Supplemental Figure 11b1. Scale bar: 5  $\mu\text{m}$ .

### **Supplementary Movie 6**

The same move to Supplementary Movie 5 with only red channel presented to clearly show the orientation of mitotic spindle. Snapshots of the dividing cell were presented in Supplemental Figure 11b2. Scale bar: 5  $\mu\text{m}$ .

### **Supplemental Data References**

1. Arnesano, C. Santoro, Y. Gratton, E. Digital parallel frequency-domain spectroscopy for tissue imaging. *J Biomed Opt* **17**, 96014-1 (2012).
2. Stringari, C. Cinquin, A. Cinquin, O. Digman, M. Donovan, PJ. Gratton, E. Phasor approach to fluorescence lifetime microscopy distinguishes different metabolic states of germ cells in a live tissue. *Proc Natl Acad Sci USA* **108**, 13582 –13587 (2011).

3. Digman, MA. Caiolfa, VR. Zamai, M. Gratton, E. The phasor approach to fluorescence lifetime imaging analysis. *Biophys J* **94**, L14–6 (2008).
4. Hinde, E. Digman, MA. Welch, C. Hahn, KM. Gratton, E. Biosensor Förster resonance energy transfer detection by the phasor approach to fluorescence lifetime imaging microscopy. *Microsc Res Tech* **75**, 271–281 (2012).
5. Hinde, E. Digman, MA. Hahn, KM. Gratton, E. Millisecond spatiotemporal dynamics of FRET biosensors by the pair correlation function and the phasor approach to FLIM. *Proc Natl Acad Sci USA* **110**, 135–140 (2013).
6. Cox, J. Neuhauser, N. Michalski, A. Scheltema, RA. Olsen, JV. and Mann, M. Andromeda: A Peptide Search Engine Integrated into the MaxQuant Environment. *J Proteome Res* **10**, 1794-1805 (2011).
7. Cox, J. and Mann, M. MaxQuant enables high peptide identification rates, individualized p.p.b.-range mass accuracies and proteome-wide protein quantification. *Nat Biotechnol* **26**, 1367-1372 (2008).
